# Supplementary material for: Revealing the Effect of Typhoons on the Stability of Residual Soil Slope by Wind Tunnel Test
Source: MDPI journal article supplement (doi:10.3390/f15050791), 2024-04-30
Supplement: s1 [file s1]

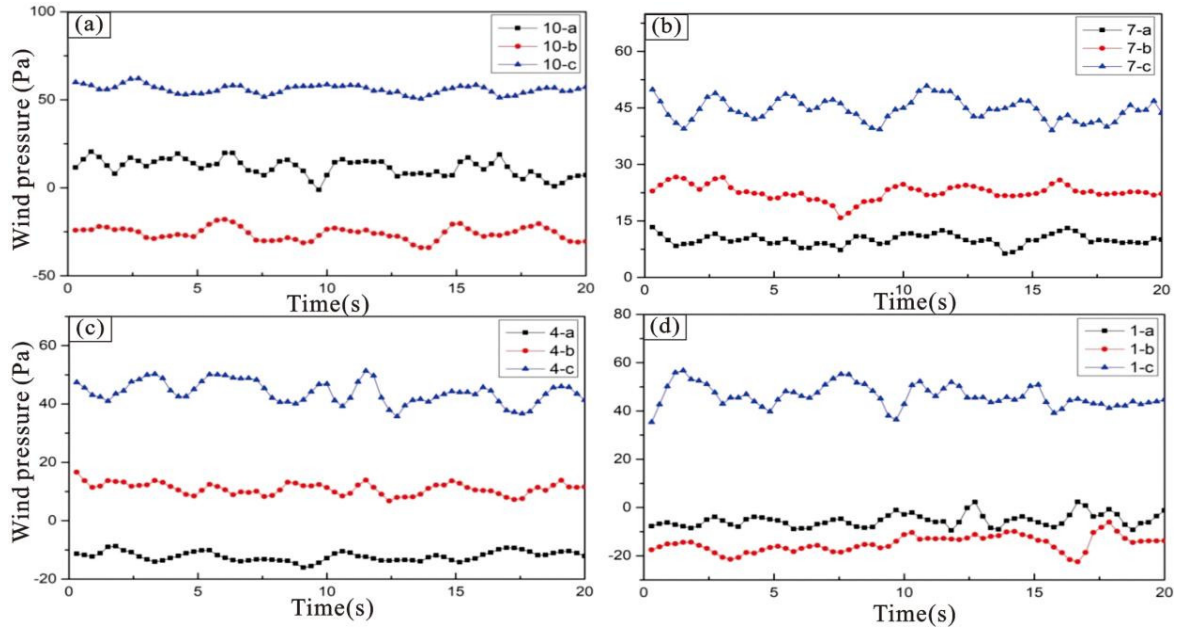

Figure S1. Wind pressure variation curves for each tree on profile 1 at a wind speed of 10.3 m/s: (a) Tree #10; (b) Tree #7; (c) Tree #4; (d) Tree #1.

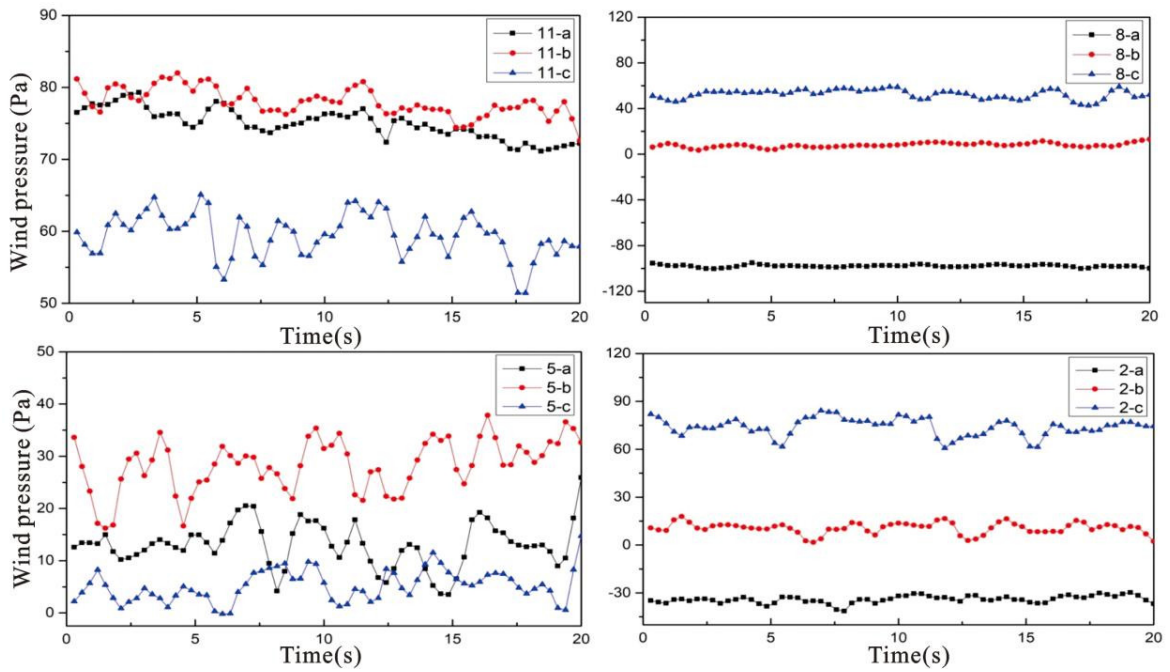

Figure S2. Wind pressure variation curves for each tree on profile 2 at wind speed 10.3 m/s: (a) Tree #11; (b) Tree #8; (c) Tree #5; (d) Tree #2.

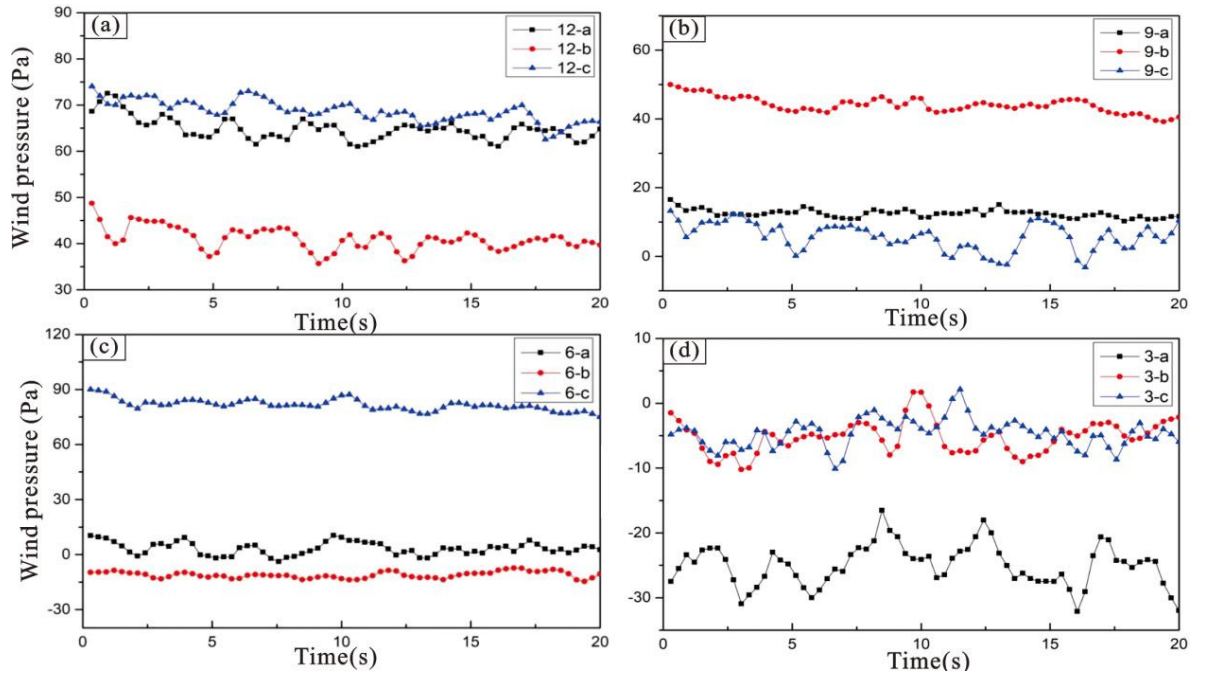

Figure S3. Wind pressure variation curves for each tree on profile 3 at wind speed 10.3 m/s: (a) Tree #12; (b) Tree #9; (c) Tree #6; (d) Tree #3.

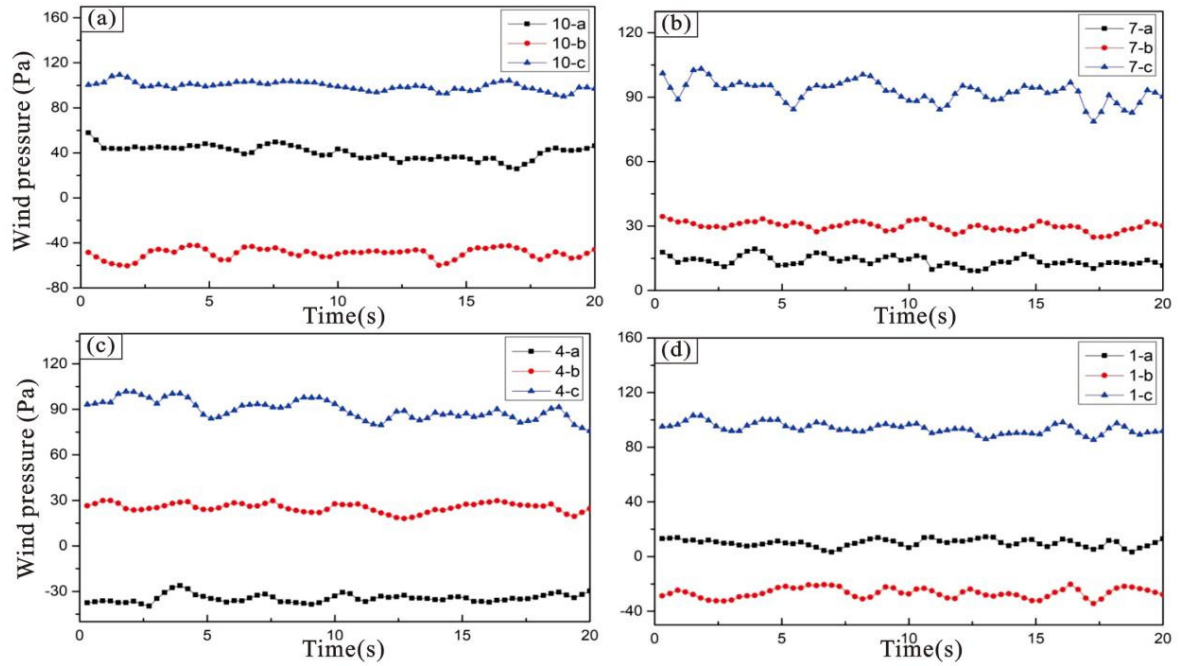

Figure S4. Wind pressure variation curves for each tree on profile 1 at a wind speed of 13.4 m/s: (a) Tree #10; (b) Tree #7; (c) Tree #4; (d) Tree #1.

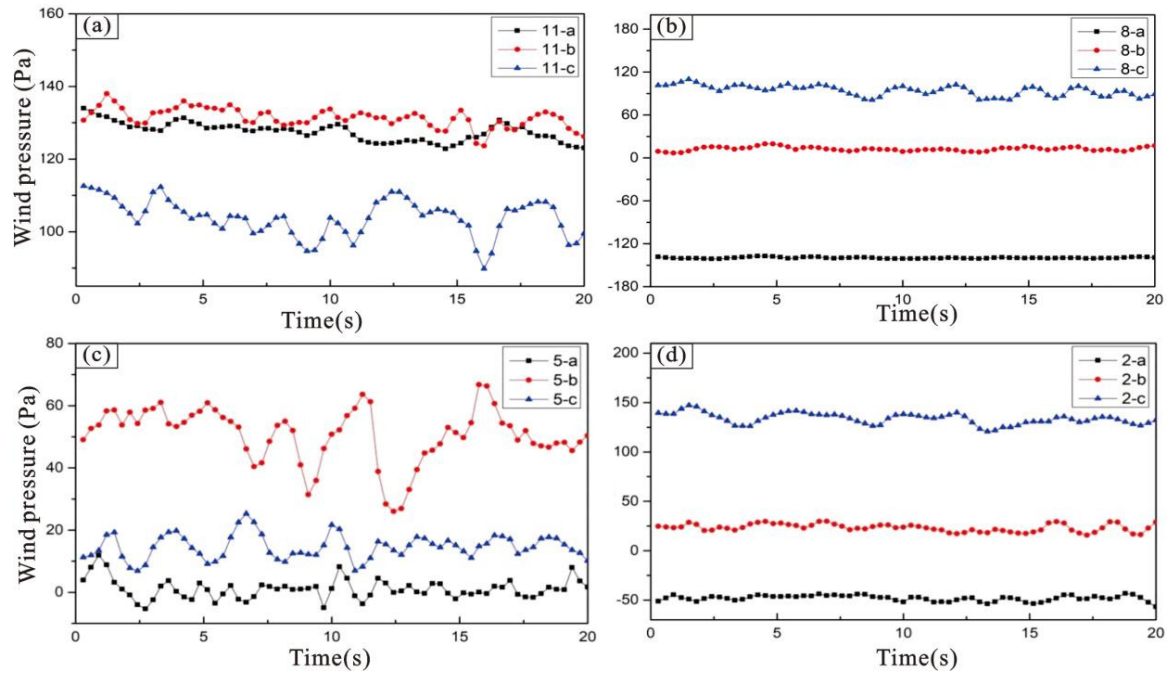

Figure S5. Wind pressure variation curves for each tree on profile 2 at a wind speed of 13.4 m/s:  
(a) Tree #11; (b) Tree #8; (c) Tree #5; (d) Tree #2.

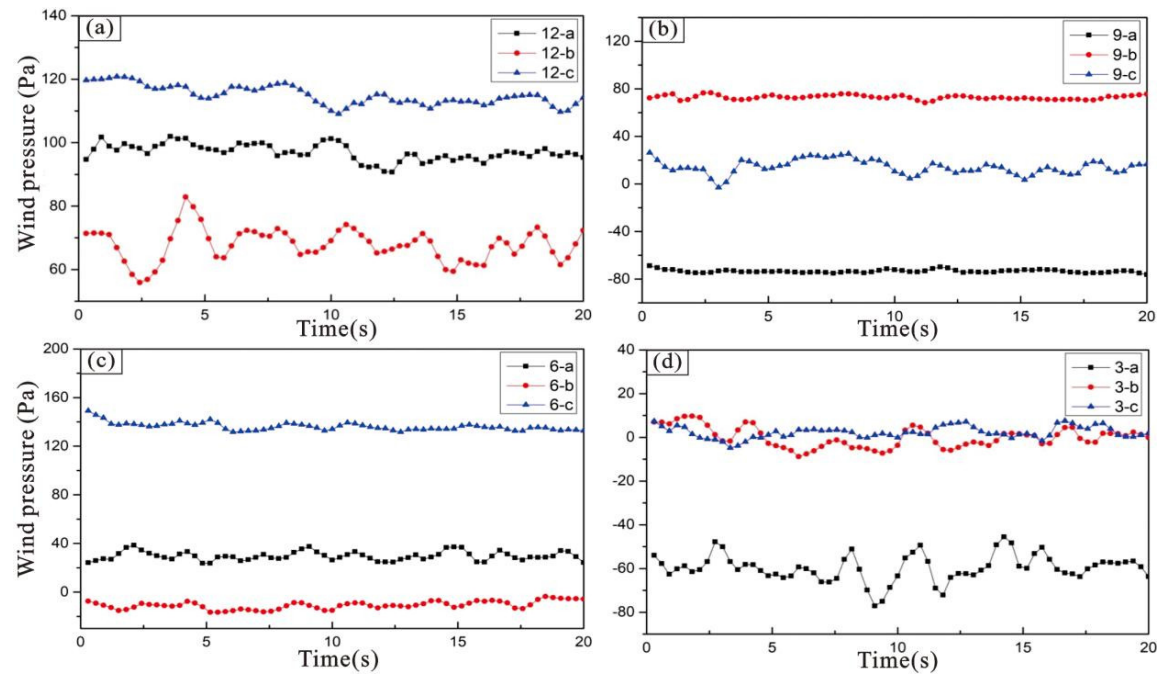

Figure S6. Wind pressure variation curves for each tree on profile 3 at a wind speed of 13.4 m/s:  
(a) Tree #12; (b) Tree #9; (c) Tree #6; (d) Tree #3.

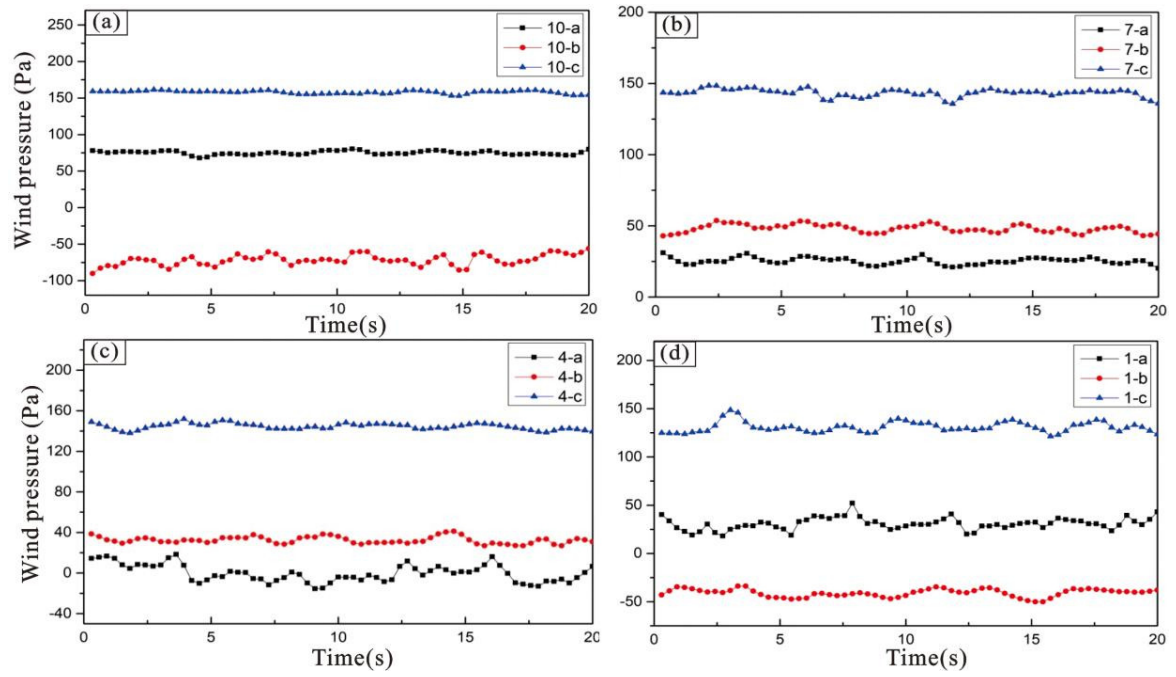

Figure S7. Wind pressure variation curves for each tree on profile 1 at a wind speed of 17 m/s: (a) Tree #10; (b) Tree #7; (c) Tree #4; (d) Tree #1.

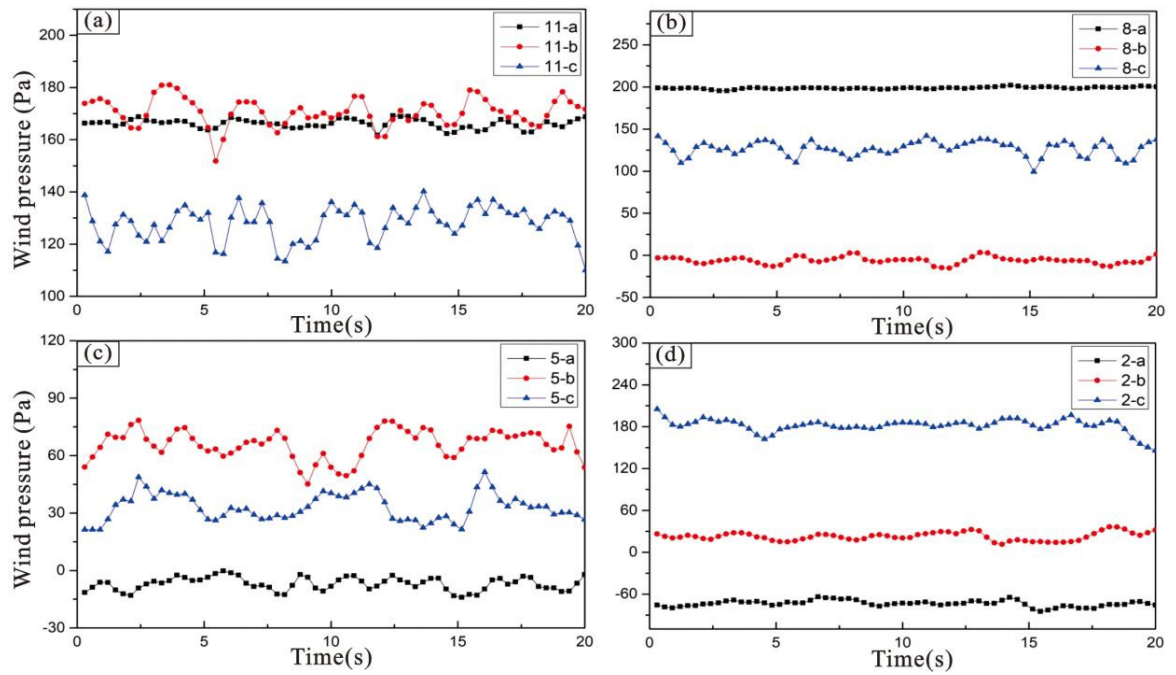

Figure S8. Wind pressure variation curves for each tree on profile 2 at a wind speed of 17 m/s: (a) Tree #11; (b) Tree #8; (c) Tree #5; (d) Tree #2.

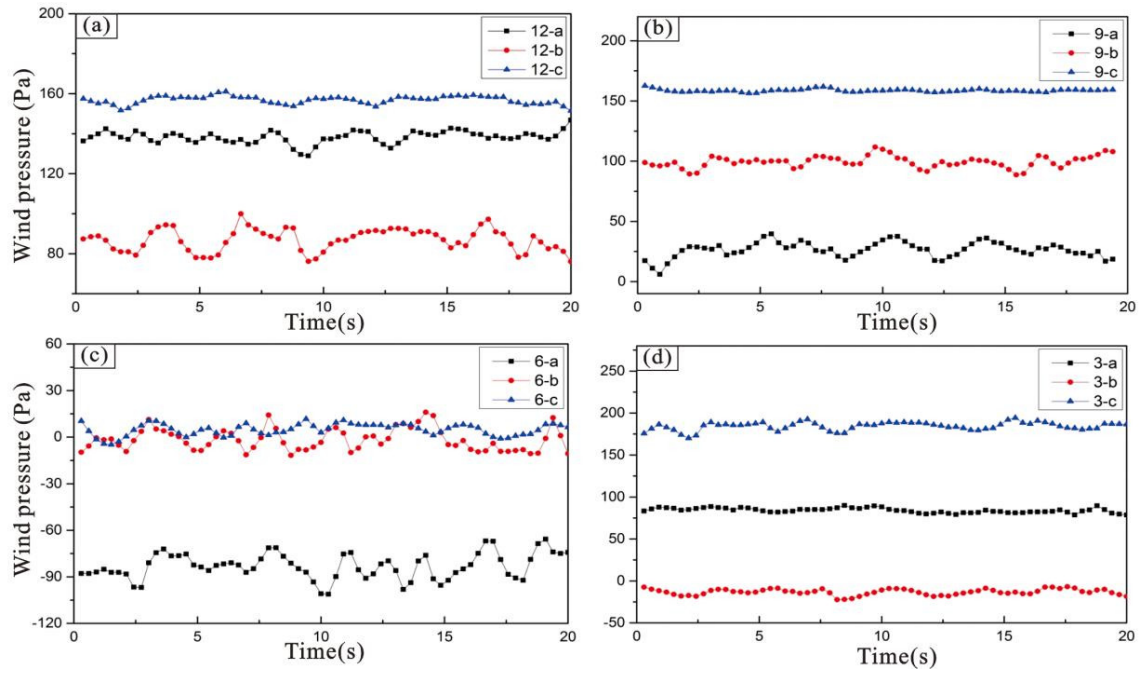

Figure S9. Wind pressure variation curves for each tree on profile 3 at a wind speed of 17 m/s: (a) Tree #12; (b) Tree #9; (c) Tree #6; (d) Tree #3.
